# Supplementary material for: Diversity of Fast-Growth Spore-Forming Microbes and Their Activity as Plant Partners
Source: MDPI journal article supplement (doi:10.3390/microorganisms11020232), 2023-01-17
Supplement: s1 [file s1]

Table S4. Metabolic activity by redox chemistry of Fukushima fungi.

| Test<br>Sample<br>(Group)         | <i>Trichoderma</i> |        |        |        | <i>Sarocladium</i> | <i>Fusarium</i> |        | <i>Bisporella</i> | <i>Penicillium</i> |        |        |        | <i>Mortierella</i> |        | <i>Cutaneotrichosporon</i> |
|-----------------------------------|--------------------|--------|--------|--------|--------------------|-----------------|--------|-------------------|--------------------|--------|--------|--------|--------------------|--------|----------------------------|
|                                   | FUK 36             | FUK 49 | FUK 40 | FUK 44 | FUK 9              | FUK 58          | FUK 16 | FUK 59            | FUK 50             | FUK 63 | FUK 66 | FUK 10 | FUK 39             | FUK 38 | FUK 6                      |
| H <sub>2</sub> O (Control)        | -                  | -      | -      | -      | +                  | INC             | INC    | INC               | -                  | -      | INC    | INC    | +                  | +      | -                          |
| <i>a</i> -Cyclodextrin            | +                  | -      | INC    | INC    | +                  | +               | +      | +                 | +                  | -      | +      | +      | +                  | -      | +                          |
| Dextrin                           | +                  | +      | +      | +      | +                  | +               | +      | +                 | +                  | +      | +      | +      | +                  | -      | +                          |
| Glycogen                          | +                  | +      | +      | +      | +                  | +               | +      | +                 | +                  | +      | +      | +      | +                  | +      | +                          |
| Tween 40                          | +                  | +      | +      | +      | +                  | +               | +      | -                 | +                  | +      | +      | +      | +                  | +      | +                          |
| Tween 80                          | +                  | +      | +      | +      | +                  | +               | +      | -                 | +                  | +      | -      | +      | +                  | +      | +                          |
| N-Acetyl-D-Galactosamine          | +                  | +      | +      | +      | -                  | +               | +      | -                 | +                  | -      | INC    | +      | -                  | +      | INC                        |
| N-Acetyl-D-Glucosamine            | +                  | +      | +      | +      | +                  | +               | +      | -                 | +                  | +      | +      | +      | -                  | +      | +                          |
| Adonitol                          | +                  | -      | INC    | INC    | +                  | +               | +      | +                 | -                  | +      | +      | INC    | -                  | +      | INC                        |
| L-Arabinose                       | -                  | -      | -      | -      | -                  | -               | -      | INC               | -                  | -      | -      | -      | -                  | -      | -                          |
| D-Arabitol                        | +                  | -      | INC    | INC    | -                  | +               | +      | -                 | -                  | -      | INC    | +      | -                  | -      | +                          |
| D-Cellobiose                      | -                  | -      | -      | -      | -                  | +               | +      | -                 | -                  | -      | -      | -      | -                  | +      | +                          |
| i-Erythritol                      | +                  | -      | INC    | INC    | +                  | +               | +      | +                 | +                  | +      | +      | +      | -                  | +      | +                          |
| D-Fructose                        | +                  | +      | +      | +      | -                  | +               | +      | +                 | +                  | -      | +      | -      | +                  | +      | +                          |
| L-Fucose                          | -                  | -      | -      | -      | -                  | +               | +      | +                 | -                  | +      | -      | -      | +                  | +      | INC                        |
| D-Galactose                       | -                  | -      | -      | -      | -                  | +               | -      | -                 | -                  | -      | -      | -      | +                  | -      | -                          |
| Gentiobiose                       | +                  | +      | +      | +      | -                  | +               | +      | -                 | -                  | +      | INC    | +      | -                  | -      | +                          |
| $\alpha$ -D-Glucose               | -                  | +      | INC    | INC    | -                  | -               | -      | INC               | -                  | -      | -      | -      | -                  | -      | -                          |
| m-Inositol                        | +                  | -      | INC    | INC    | +                  | +               | +      | -                 | -                  | -      | -      | +      | -                  | -      | +                          |
| $\alpha$ -D-Lactose               | +                  | -      | INC    | INC    | INC                | +               | +      | +                 | +                  | +      | +      | +      | -                  | +      | +                          |
| Lactulose                         | +                  | +      | +      | +      | INC                | +               | +      | -                 | -                  | -      | -      | +      | -                  | +      | +                          |
| Maltose                           | +                  | +      | +      | +      | -                  | +               | +      | -                 | -                  | INC    | -      | +      | +                  | -      | +                          |
| D-Mannitol                        | INC                | -      | INC    | INC    | -                  | -               | +      | -                 | -                  | INC    | -      | +      | -                  | -      | +                          |
| D-Mannose                         | INC                | -      | INC    | INC    | -                  | +               | -      | -                 | -                  | +      | INC    | -      | -                  | -      | -                          |
| D-Melibiose                       | +                  | +      | +      | +      | +                  | +               | +      | +                 | +                  | +      | +      | +      | +                  | +      | +                          |
| $\beta$ -Methyl-D-Glucoside       | +                  | +      | +      | +      | -                  | +               | +      | -                 | +                  | +      | -      | +      | -                  | +      | +                          |
| D-Psicose                         | -                  | INC    | -      | INC    | -                  | -               | -      | -                 | -                  | -      | INC    | -      | -                  | -      | -                          |
| D-Raffinose                       | +                  | -      | INC    | INC    | -                  | +               | +      | -                 | +                  | +      | +      | +      | -                  | -      | +                          |
| L-Rhamnose                        | +                  | -      | INC    | INC    | -                  | +               | +      | -                 | -                  | -      | -      | -      | -                  | -      | INC                        |
| D-Sorbitol                        | +                  | +      | +      | +      | +                  | +               | +      | -                 | INC                | -      | -      | +      | +                  | -      | +                          |
| Sucrose                           | +                  | +      | +      | +      | -                  | +               | +      | -                 | +                  | -      | -      | +      | +                  | +      | +                          |
| D-Trehalose                       | +                  | +      | +      | +      | +                  | +               | +      | -                 | -                  | -      | -      | +      | +                  | +      | +                          |
| Turanose                          | +                  | +      | +      | +      | +                  | +               | +      | -                 | -                  | INC    | -      | +      | +                  | +      | +                          |
| Xylitol                           | +                  | +      | +      | +      | +                  | +               | +      | -                 | -                  | -      | -      | +      | -                  | -      | +                          |
| Pyruvic acid Methyl Ester         | +                  | -      | INC    | INC    | +                  | +               | +      | +                 | -                  | INC    | INC    | +      | -                  | +      | INC                        |
| Succinic acid Mono- Methyl Ester  | +                  | -      | INC    | INC    | +                  | +               | +      | -                 | -                  | INC    | +      | INC    | -                  | +      | +                          |
| Acetic acid                       | +                  | +      | +      | +      | +                  | +               | +      | -                 | +                  | +      | +      | +      | +                  | +      | +                          |
| Cis-Aconitic acid                 | +                  | +      | +      | +      | +                  | +               | +      | +                 | +                  | +      | +      | +      | +                  | +      | +                          |
| Citric acid                       | +                  | +      | +      | +      | +                  | +               | +      | +                 | -                  | -      | +      | +      | -                  | +      | +                          |
| Formic acid                       | +                  | +      | +      | +      | +                  | +               | +      | -                 | +                  | +      | +      | +      | +                  | +      | +                          |
| D-Galactonic acid Lactone         | INC                | -      | INC    | INC    | +                  | +               | +      | +                 | +                  | +      | +      | +      | -                  | +      | +                          |
| D-Galacturonic acid               | INC                | -      | INC    | INC    | +                  | +               | +      | -                 | -                  | +      | INC    | INC    | +                  | +      | INC                        |
| D-Gluconic acid                   | +                  | +      | +      | +      | +                  | +               | +      | -                 | +                  | +      | +      | +      | -                  | +      | +                          |
| Glucosaminic acid                 | +                  | +      | +      | +      | +                  | +               | +      | +                 | +                  | +      | -      | +      | -                  | +      | +                          |
| D-Glucuronic acid                 | INC                | INC    | INC    | INC    | +                  | -               | -      | -                 | -                  | +      | -      | INC    | -                  | +      | INC                        |
| $\gamma$ -Hydroxybutyric acid     | +                  | +      | INC    | +      | +                  | +               | +      | -                 | +                  | -      | -      | -      | -                  | +      | +                          |
| $\beta$ -Hydroxybutyric acid      | INC                | -      | INC    | INC    | +                  | +               | +      | -                 | +                  | +      | -      | +      | -                  | +      | +                          |
| $\alpha$ -Hydroxybutyric acid     | +                  | +      | +      | +      | +                  | +               | +      | +                 | +                  | +      | +      | +      | -                  | +      | +                          |
| p-Hydroxyphenylacetic acid        | +                  | -      | INC    | INC    | +                  | +               | +      | -                 | +                  | +      | +      | +      | +                  | +      | +                          |
| Itaconic acid                     | +                  | +      | +      | +      | -                  | +               | +      | -                 | +                  | +      | +      | +      | +                  | +      | +                          |
| $\alpha$ -Ketobutyric acid        | +                  | +      | +      | +      | +                  | +               | +      | +                 | +                  | +      | +      | +      | +                  | -      | +                          |
| $\alpha$ -Ketoglutaric acid       | +                  | +      | +      | +      | +                  | +               | +      | -                 | +                  | +      | +      | +      | +                  | INC    | +                          |
| $\alpha$ -Ketovaleric acid        | +                  | +      | +      | +      | +                  | +               | +      | -                 | -                  | +      | -      | +      | +                  | +      | +                          |
| D,L-Lactic acid                   | +                  | -      | +      | +      | +                  | +               | +      | -                 | +                  | +      | +      | +      | -                  | +      | +                          |
| Malonic acid                      | +                  | +      | +      | +      | +                  | +               | +      | -                 | +                  | +      | +      | +      | +                  | +      | +                          |
| Propionic acid                    | +                  | +      | +      | +      | +                  | +               | +      | -                 | +                  | +      | +      | +      | +                  | +      | +                          |
| Quinic acid                       | +                  | +      | +      | +      | +                  | +               | +      | -                 | +                  | +      | +      | +      | -                  | -      | +                          |
| D-Saccharic acid                  | +                  | +      | +      | +      | +                  | +               | +      | -                 | -                  | +      | -      | INC    | -                  | -      | +                          |
| Sebacic acid                      | -                  | -      | -      | INC    | +                  | -               | +      | -                 | +                  | +      | -      | INC    | -                  | -      | +                          |
| Succinic acid                     | INC                | -      | INC    | INC    | +                  | +               | +      | -                 | -                  | +      | INC    | INC    | -                  | -      | -                          |
| Bromosuccinic acid                | +                  | +      | +      | +      | +                  | +               | +      | -                 | +                  | INC    | +      | -      | +                  | +      | +                          |
| Succinamic acid                   | +                  | -      | INC    | INC    | INC                | +               | +      | +                 | +                  | +      | +      | +      | +                  | +      | +                          |
| Glucuronamide                     | -                  | +      | -      | INC    | -                  | -               | -      | +                 | -                  | -      | -      | -      | -                  | INC    | -                          |
| L-Alaninamide                     | +                  | +      | +      | +      | +                  | +               | +      | -                 | +                  | -      | -      | +      | +                  | +      | +                          |
| D-Alanine                         | +                  | +      | +      | +      | +                  | +               | +      | -                 | +                  | +      | +      | +      | -                  | -      | +                          |
| L-Alanine                         | +                  | +      | +      | +      | +                  | +               | +      | -                 | +                  | +      | +      | +      | +                  | -      | +                          |
| L-Alanyl-Glycine                  | +                  | +      | +      | +      | +                  | INC             | INC    | -                 | +                  | +      | +      | +      | +                  | +      | +                          |
| L-Asparagine                      | +                  | +      | +      | +      | -                  | INC             | INC    | -                 | -                  | +      | +      | +      | -                  | -      | +                          |
| L-Asparagic acid                  | +                  | +      | +      | +      | INC                | INC             | INC    | -                 | +                  | +      | +      | +      | -                  | -      | +                          |
| L-Glutamic acid                   | +                  | +      | +      | +      | +                  | +               | +      | -                 | +                  | +      | +      | +      | -                  | -      | +                          |
| Glycyl-L-Aspartic acid            | +                  | +      | +      | +      | +                  | +               | +      | -                 | -                  | +      | INC    | +      | -                  | -      | +                          |
| Glycyl-L-Glutamic acid            | +                  | +      | +      | +      | +                  | +               | +      | -                 | INC                | INC    | +      | -      | +                  | INC    | +                          |
| L-Histidine                       | +                  | +      | +      | +      | +                  | +               | +      | -                 | -                  | +      | -      | +      | +                  | +      | +                          |
| Hydroxy-L. proline                | +                  | +      | +      | +      | -                  | +               | +      | -                 | +                  | +      | +      | +      | +                  | +      | +                          |
| L-Leucine                         | +                  | -      | INC    | INC    | +                  | +               | +      | +                 | +                  | +      | +      | +      | -                  | +      | +                          |
| L-Ornithine                       | +                  | +      | +      | +      | +                  | +               | +      | +                 | +                  | +      | INC    | +      | +                  | +      | +                          |
| L-Phenylalanine                   | +                  | +      | +      | +      | +                  | +               | +      | -                 | INC                | -      | -      | +      | +                  | +      | +                          |
| L-Proline                         | +                  | +      | +      | +      | +                  | +               | +      | -                 | +                  | INC    | -      | +      | +                  | +      | +                          |
| L-Pyrogutamic acid                | +                  | +      | +      | +      | -                  | +               | +      | -                 | INC                | -      | +      | +      | +                  | -      | +                          |
| D-Serine                          | +                  | +      | +      | +      | -                  | +               | +      | -                 | INC                | -      | +      | +      | +                  | INC    | +                          |
| L-Serine                          | +                  | +      | +      | +      | +                  | +               | +      | -                 | +                  | -      | INC    | +      | +                  | -      | +                          |
| L-Threonine                       | +                  | +      | +      | +      | +                  | +               | +      | -                 | -                  | +      | INC    | +      | -                  | -      | +                          |
| D,L-Carnitine                     | +                  | +      | +      | +      | +                  | +               | +      | -                 | -                  | INC    | +      | INC    | -                  | -      | +                          |
| $\gamma$ -Aminobutyric acid       | INC                | -      | INC    | INC    | +                  | -               | +      | -                 | -                  | +      | -      | +      | -                  | -      | +                          |
| Urocanic acid                     | INC                | -      | INC    | INC    | +                  | +               | +      | +                 | -                  | -      | +      | -      | +                  | +      | +                          |
| Inosine                           | +                  | -      | INC    | INC    | +                  | +               | +      | -                 | +                  | +      | +      | +      | +                  | +      | +                          |
| Uridine                           | INC                | -      | INC    | INC    | +                  | +               | +      | -                 | +                  | -      | -      | +      | -                  | +      | +                          |
| Thymidine                         | +                  | +      | +      | +      | +                  | +               | +      | -                 | +                  | -      | INC    | +      | +                  | -      | +                          |
| Phenylethyl-amine                 | +                  | +      | +      | +      | +                  | +               | +      | -                 | +                  | +      | +      | +      | +                  | INC    | +                          |
| Putrescine                        | +                  | +      | +      | +      | INC                | +               | +      | -                 | -                  | +      | -      | +      | -                  | +      | +                          |
| 2-Aminoethanol                    | +                  | +      | +      | +      | +                  | +               | +      | -                 | +                  | -      | INC    | +      | -                  | +      | +                          |
| 2,3-Butanediol                    | +                  | -      | INC    | INC    | +                  | +               | +      | -                 | +                  | +      | +      | +      | -                  | +      | +                          |
| Glycerol                          | INC                | -      | INC    | INC    | +                  | +               | +      | -                 | +                  | +      | +      | +      | -                  | +      | +                          |
| D,L, $\alpha$ -Glycerol-Phosphate | INC                | -      | INC    | INC    | +                  | +               | +      | -                 | +                  | +      | +      | +      | +                  | +      | +                          |
| $\alpha$ -D-Glucose-1-Phosphate   | +                  | -      | INC    | INC    | +                  | +               | +      | -                 | +                  | +      | -      | -      | -                  | -      | +                          |
| D-Glucose-6-Phosphate             | INC                | -      | INC    | INC    | +                  | +               | +      | -                 | -                  | +      | INC    | INC    | -                  | -      | INC                        |

INC: inconclusive results due to the time to response (some took more than week)

+: positive reaction

-: no reaction.
