# Supplementary material for: Diversity of Fast-Growth Spore-Forming Microbes and Their Activity as Plant Partners
Source: MDPI journal article supplement (doi:10.3390/microorganisms11020232), 2023-01-17
Supplement: s1 [file s1]

Table S3. Metabolic activity by redox chemistry of Fukushima SF-bacteria

| Test                             | Sample<br>(Group) | Priestia |          | Bacillus pumilus |          |         |         | Bacillus thuringiensis |         |          | Peribacillus |         | Viridibacillus | Lysinibacillus | Soilbacillus | Paenibacillus |        |          |          |
|----------------------------------|-------------------|----------|----------|------------------|----------|---------|---------|------------------------|---------|----------|--------------|---------|----------------|----------------|--------------|---------------|--------|----------|----------|
|                                  |                   | FUK10_7  | FUK13_14 | FUK8_6           | FUK10_10 | FUK11_1 | FUK11_7 | FUK4_10                | FUK5_22 | FUK11_14 | FUK5_23      | FUK11_2 | FUK13_15       | FUK10_6        | FUK4_31      | FUK4_8        | FUK7_4 | FUK11_10 | FUK13_16 |
| H <sub>2</sub> O (Control)       |                   | -        | -        | -                | -        | -       | -       | -                      | -       | -        | -            | -       | -              | -              | -            | -             | -      | -        | -        |
| α-Cyclodextrin                   |                   | -        | -        | +                | -        | +       | +       | +                      | -       | +        | +            | -       | +              | -              | -            | -             | +      | +        | -        |
| Dextrin                          |                   | +        | +        | +                | -        | +       | -       | -                      | -       | +        | +            | +       | +              | +              | +            | -             | +      | +        | -        |
| Glycogen                         |                   | +        | +        | +                | -        | +       | +       | +                      | +       | +        | +            | +       | +              | +              | -            | +             | +      | +        | +        |
| Tween 40                         |                   | +        | +        | +                | -        | +       | -       | -                      | +       | +        | +            | -       | -              | +              | +            | +             | -      | INC      | +        |
| Tween 80                         |                   | -        | -        | -                | -        | INC     | +       | +                      | -       | +        | -            | -       | -              | -              | +            | -             | -      | -        | -        |
| N-Acetyl-D-Galactosamine         |                   | +        | +        | -                | -        | +       | -       | -                      | +       | +        | -            | +       | +              | INC            | -            | -             | +      | +        | -        |
| N-Acetyl-D-Glucosamine           |                   | +        | +        | +                | -        | +       | +       | +                      | -       | -        | -            | -       | -              | -              | -            | INC           | -      | +        | INC      |
| Adonitol                         |                   | +        | +        | +                | -        | +       | +       | +                      | -       | -        | +            | -       | -              | INC            | +            | -             | -      | +        | -        |
| L-Arabinose                      | INC               | INC      | -        | -                | -        | -       | -       | -                      | -       | -        | -            | INC     | -              | INC            | -            | -             | -      | -        | -        |
| D-Arabitol                       | +                 | +        | +        | -                | -        | +       | +       | +                      | -       | +        | -            | +       | +              | +              | -            | +             | +      | -        | +        |
| D-Cellobiose                     | +                 | +        | +        | +                | -        | +       | +       | +                      | -       | +        | -            | +       | +              | +              | +            | +             | +      | INC      | -        |
| i-Erythritol                     | +                 | +        | +        | +                | +        | +       | +       | +                      | INC     | +        | +            | +       | INC            | +              | +            | +             | +      | INC      | +        |
| D-Fructose                       | +                 | +        | -        | -                | +        | +       | +       | +                      | -       | +        | +            | INC     | +              | INC            | +            | -             | +      | -        | -        |
| L-Fucose                         | +                 | +        | INC      | -                | +        | +       | +       | +                      | +       | -        | +            | +       | +              | +              | +            | -             | +      | -        | -        |
| D-Galactose                      | INC               | INC      | -        | -                | -        | -       | -       | +                      | INC     | -        | -            | INC     | -              | INC            | -            | -             | -      | -        | -        |
| Gentiobiose                      | +                 | +        | -        | -                | -        | -       | +       | +                      | +       | +        | +            | +       | +              | +              | +            | -             | +      | INC      | -        |
| α-D-Glucose                      | -                 | -        | -        | -                | -        | -       | -       | -                      | -       | -        | -            | INC     | -              | INC            | +            | INC           | -      | +        | -        |
| m-Inositol                       | +                 | +        | -        | -                | +        | -       | +       | +                      | -       | -        | -            | +       | +              | +              | -            | +             | +      | +        | -        |
| α-D-Lactose                      | +                 | +        | +        | -                | +        | +       | +       | +                      | -       | -        | +            | +       | +              | +              | +            | -             | +      | INC      | -        |
| Lactulose                        | +                 | +        | +        | -                | +        | +       | +       | +                      | +       | +        | INC          | +       | +              | -              | +            | -             | +      | INC      | -        |
| Maltose                          | +                 | +        | -        | -                | +        | +       | +       | +                      | -       | +        | +            | INC     | -              | +              | +            | +             | +      | +        | +        |
| D-Mannitol                       | +                 | +        | +        | -                | -        | +       | +       | +                      | -       | +        | -            | +       | +              | +              | +            | -             | +      | -        | -        |
| D-Mannose                        | -                 | -        | INC      | -                | +        | INC     | INC     | INC                    | -       | INC      | -            | -       | -              | -              | +            | -             | +      | -        | -        |
| D-Melibiose                      | +                 | +        | -        | -                | +        | +       | +       | +                      | -       | +        | +            | +       | +              | +              | +            | -             | +      | -        | -        |
| β-Methyl-D-Glucoside             | +                 | +        | INC      | +                | +        | +       | +       | +                      | INC     | +        | +            | +       | +              | +              | +            | +             | +      | +        | +        |
| D-Psicose                        | -                 | -        | -        | -                | -        | -       | -       | -                      | -       | -        | -            | -       | -              | -              | -            | -             | -      | -        | -        |
| D-Raffinose                      | +                 | +        | -        | -                | +        | +       | +       | +                      | +       | +        | +            | +       | +              | INC            | +            | -             | +      | -        | -        |
| L-Rhamnose                       | INC               | INC      | -        | -                | -        | INC     | -       | +                      | +       | -        | -            | INC     | -              | INC            | -            | +             | -      | -        | -        |
| D-Sorbitol                       | +                 | +        | -        | -                | +        | +       | +       | +                      | +       | +        | +            | +       | +              | +              | -            | -             | -      | +        | -        |
| Sucrose                          | +                 | +        | -        | -                | +        | +       | +       | +                      | -       | +        | +            | +       | +              | +              | -            | -             | +      | +        | -        |
| D-Trehalose                      | +                 | +        | +        | +                | -        | +       | +       | +                      | +       | +        | +            | +       | +              | +              | -            | -             | +      | +        | -        |
| Turanose                         | +                 | +        | +        | -                | +        | +       | +       | +                      | +       | INC      | INC          | +       | +              | INC            | +            | -             | +      | INC      | -        |
| Xylitol                          | +                 | +        | -        | -                | -        | +       | +       | -                      | +       | +        | -            | +       | +              | +              | +            | -             | +      | -        | -        |
| Pyruvic acid Methyl Ester        | INC               | INC      | +        | -                | INC      | +       | +       | -                      | -       | -        | -            | +       | -              | -              | +            | -             | -      | -        | -        |
| Succinic acid Mono- Methyl Ester | +                 | +        | +        | -                | -        | +       | +       | -                      | +       | -        | -            | -       | -              | -              | +            | -             | +      | -        | -        |
| Acetic acid                      | -                 | -        | +        | +                | +        | +       | +       | +                      | -       | +        | +            | +       | +              | +              | +            | +             | +      | +        | +        |
| Cis-Aconitic acid                | -                 | -        | +        | +                | +        | +       | +       | +                      | -       | +        | +            | -       | +              | +              | +            | INC           | -      | -        | INC      |
| Citric acid                      | +                 | +        | +        | +                | +        | +       | +       | +                      | -       | +        | +            | -       | +              | +              | +            | -             | -      | +        | -        |
| Formic acid                      | -                 | -        | +        | -                | +        | INC     | -       | +                      | +       | +        | +            | +       | -              | +              | +            | +             | -      | +        | +        |
| D-Galactonic acid Lactone        | +                 | +        | -        | -                | +        | -       | +       | +                      | -       | -        | -            | INC     | INC            | +              | +            | -             | -      | -        | -        |
| D-Galacturonic acid              | +                 | +        | +        | -                | INC      | +       | +       | -                      | INC     | -        | -            | +       | -              | -              | -            | -             | -      | -        | -        |
| D-Gluconic acid                  | +                 | +        | -        | -                | +        | +       | +       | -                      | -       | +        | -            | +       | +              | +              | +            | -             | +      | +        | -        |
| Glucosaminic acid                | +                 | +        | -        | -                | +        | +       | +       | +                      | +       | +        | -            | INC     | +              | +              | +            | -             | +      | +        | -        |
| D-Glucuronic acid                | +                 | +        | +        | -                | +        | +       | +       | +                      | +       | +        | +            | -       | -              | +              | +            | -             | -      | -        | -        |
| γ-Hydroxybutyric acid            | -                 | -        | +        | -                | -        | +       | +       | +                      | -       | +        | -            | -       | +              | +              | +            | -             | -      | -        | -        |
| β-Hydroxybutyric acid            | +                 | +        | +        | -                | -        | +       | +       | -                      | -       | +        | -            | -       | +              | +              | +            | INC           | INC    | -        | INC      |
| α-Hydroxybutyric acid            | +                 | +        | +        | -                | +        | +       | +       | +                      | -       | +        | -            | -       | +              | +              | +            | -             | +      | INC      | -        |
| p-Hydroxyphenylacetic acid       | +                 | +        | +        | -                | +        | +       | +       | +                      | -       | +        | +            | +       | +              | INC            | +            | +             | +      | +        | +        |
| Itaconic acid                    | +                 | +        | +        | -                | +        | -       | -       | -                      | -       | +        | +            | -       | +              | +              | -            | INC           | -      | +        | INC      |
| α-Ketobutyric acid               | +                 | +        | -        | -                | +        | +       | +       | +                      | +       | +        | +            | +       | +              | +              | +            | +             | INC    | +        | +        |
| α-Ketoglutaric acid              | +                 | +        | +        | -                | +        | INC     | +       | +                      | +       | +        | -            | INC     | +              | +              | -            | +             | +      | +        | +        |
| α-Ketovaleric acid               | +                 | +        | -        | -                | +        | +       | +       | +                      | +       | -        | -            | +       | +              | +              | -            | +             | +      | +        | +        |
| D,L-Lactic acid                  | -                 | -        | +        | -                | +        | INC     | +       | -                      | INC     | -        | -            | +       | +              | +              | -            | -             | +      | -        | -        |
| Malonic acid                     | +                 | +        | +        | -                | +        | INC     | +       | +                      | +       | +        | -            | +       | +              | +              | +            | -             | +      | -        | -        |
| Propionic acid                   | +                 | +        | +        | -                | +        | INC     | +       | +                      | -       | +        | +            | -       | +              | +              | +            | +             | +      | +        | +        |
| Quinic acid                      | +                 | +        | +        | -                | INC      | +       | +       | -                      | +       | -        | -            | +       | +              | +              | +            | +             | +      | -        | -        |
| D-Saccharic acid                 | +                 | +        | +        | -                | +        | +       | -       | -                      | -       | +        | -            | +       | +              | +              | +            | -             | +      | -        | -        |
| Sebacic acid                     | +                 | +        | +        | -                | +        | +       | -       | -                      | +       | -        | -            | +       | -              | +              | +            | -             | +      | -        | -        |
| Succinic acid                    | +                 | +        | +        | -                | -        | +       | +       | +                      | -       | -        | -            | -       | INC            | +              | +            | -             | -      | -        | -        |
| Bromosuccinic acid               | +                 | +        | +        | INC              | +        | +       | +       | -                      | +       | +        | +            | +       | +              | +              | +            | +             | +      | +        | +        |
| Succinamic acid                  | +                 | +        | +        | -                | +        | +       | +       | -                      | +       | -        | -            | +       | +              | INC            | +            | +             | +      | INC      | +        |
| Glucuronamide                    | INC               | INC      | INC      | -                | +        | INC     | -       | -                      | +       | -        | -            | -       | -              | -              | -            | -             | -      | -        | -        |
| L-Alaninamide                    | +                 | +        | +        | -                | +        | +       | +       | +                      | +       | INC      | INC          | +       | +              | +              | -            | -             | +      | INC      | -        |
| D-Alanine                        | +                 | +        | +        | -                | +        | +       | -       | -                      | +       | +        | -            | -       | +              | +              | +            | -             | -      | +        | -        |
| L-Alanine                        | +                 | +        | +        | -                | +        | +       | +       | -                      | +       | +        | -            | +       | +              | +              | +            | -             | +      | +        | -        |
| L-Alanyl-Glycine                 | +                 | +        | +        | -                | +        | +       | +       | +                      | -       | +        | -            | +       | +              | +              | -            | -             | +      | +        | -        |
| L-Asparagine                     | +                 | +        | +        | -                | +        | +       | +       | +                      | +       | -        | -            | -       | +              | +              | -            | -             | +      | INC      | -        |
| L-Aspartic acid                  | +                 | +        | +        | -                | +        | +       | +       | +                      | -       | +        | -            | INC     | +              | +              | +            | +             | +      | +        | +        |
| L-Glutamic acid                  | +                 | +        | +        | -                | INC      | +       | +       | +                      | -       | +        | -            | INC     | +              | +              | -            | -             | +      | INC      | -        |
| Glycyl-L-Aspartic acid           | -                 | -        | +        | +                | INC      | +       | +       | -                      | +       | +        | -            | -       | +              | +              | -            | -             | -      | -        | -        |
| Glycyl-L-Glutamic acid           | +                 | +        | +        | -                | +        | +       | +       | +                      | -       | +        | +            | +       | +              | +              | -            | -             | +      | -        | -        |
| L-Histidine                      | +                 | +        | +        | -                | +        | +       | +       | +                      | -       | +        | +            | +       | +              | +              | +            | -             | +      | +        | -        |
| Hydroxy-L proline                | +                 | +        | +        | -                | +        | +       | +       | +                      | -       | +        | +            | +       | +              | +              | +            | -             | +      | INC      | -        |
| L-Leucine                        | -                 | -        | +        | +                | +        | -       | +       | -                      | +       | +        | +            | +       | +              | +              | +            | INC           | INC    | +        | INC      |
| L-Ornithine                      | -                 | -        | -        | -                | +        | +       | +       | +                      | +       | +        | +            | +       | +              | +              | -            | -             | -      | +        | -        |
| L-Phenylalanine                  | +                 | +        | +        | -                | +        | +       | +       | +                      | +       | +        | -            | -       | +              | +              | +            | -             | -      | -        | -        |
| L-Proline                        | +                 | +        | +        | -                | +        | +       | -       | -                      | +       | +        | -            | INC     | +              | +              | +            | -             | +      | INC      | -        |
| L-Pyroglutamic acid              | +                 | +        | +        | -                | +        | +       | +       | -                      | -       | +        | INC          | +       | +              | +              | -            | -             | +      | -        | -        |
| D-Serine                         | +                 | +        | +        | -                | +        | +       | +       | +                      | +       | +        | INC          | -       | -              | +              | +            | -             | -      | -        | -        |
| L-Serine                         | +                 | +        | +        | -                | INC      | +       | +       | -                      | -       | +        | -            | -       | -              | +              | +            | -             | -      | -        | -        |
| L-Threonine                      | +                 | +        | +        | -                | INC      | +       | +       | -                      | -       | +        | -            | -       | -              | +              | -            | -             | INC    | INC      | -        |
| D,L-Carnitine                    | +                 | +        | +        | -                | +        | +       | +       | +                      | -       | +        | INC          | -       | -              | +              | +            | INC           | INC    | INC      | INC      |
| γ-Aminobutyric acid              | +                 | +        | +        | -                | -        | +       | +       | +                      | -       | +        | -            | -       | INC            | +              | +            | -             | -      | -        | -        |
| Urocanic acid                    | +                 | +        | +        | -                | +        | +       | +       | +                      | -       | +        | -            | +       | +              | +              | +            | INC           | +      | -        | -        |
| Inosine                          | +                 | +        | +        | -                | +        | +       | +       | +                      | +       | +        | +            | +       | +              | +              | +            | -             | +      | +        | -        |
| Uridine                          | +                 | +        | +        | -                | +        | +       | +       | +                      | +       | +        | +            | +       | +              | +              | +            | -             | +      | +        | -        |
| Thymidine                        | +                 | +        | +        | -                | +        | +       | +       | +                      | +       | +        | -            | -       | +              | +              | -            | -             | -      | -        | -        |
| Phenylethyl-amine                | +                 | +        | +        | -                | -        | INC     | -       | +                      | INC     | -        | +            | -       | -              | -              | -            | -             | -      | +        | -        |
| Putrescine                       | +                 | +        | +        | -                | +        | +       | +       | +                      | +       | +        | +            | -       | +              | +              | -            | -             | +      | +        | -        |
| 2-Aminoethanol                   | +                 | +        | +        | -                | +        | +       | +       | +                      | +       | +        | +            | INC     | +              | +              | -            | -             | INC    | +        | -        |
| 2,3-Butanediol                   | +                 | +        | +        | -                | +        | +       | +       | -                      | -       | +        | INC          | INC     | +              | +              | -            | -             | +      | INC      | -        |
| Glycerol                         | +                 | +        | -        | -                | +        | +       | +       | +                      | +       | +        | +            | +       | +              | +              | +            | -             | +      | +        | -        |
| D,L-α-Glycerol-Phosphate         | +                 | +        | +        | INC              | -        | +       | +       | +                      | -       | +        | +            | -       |                |                |              |               |        |          |          |

INC: inconclusive results due to the time response (some took more than week)

+ : positive reaction

- : no reaction.
