# Supplementary material for: Diversity of Fast-Growth Spore-Forming Microbes and Their Activity as Plant Partners
Source: MDPI journal article supplement (doi:10.3390/microorganisms11020232), 2023-01-17
Supplement: s1 [file s1]

**Table S1. Soil and Rhizosphere sample characteristics**

| Number / Label | Location  | Origin      | Sample Characteristics                                    | Bacteria   | Fungus    | Total SFM (cultured) |
|----------------|-----------|-------------|-----------------------------------------------------------|------------|-----------|----------------------|
| 1              | Fukushima | Soil        | Forest, Soil under mixed litter                           | 21         | 4         | 25                   |
| 2              | Fukushima | Rhizosphere | Field, Japanese pampas grass root                         | 14         | 3         | 17                   |
| 3              | Fukushima | Rhizosphere | Litter mix from radioactive area, river area (downstream) | 20         | 4         | 24                   |
| 4              | Fukushima | Rhizosphere | Forest, Litter mix                                        | 37         | 8         | 45                   |
| 5              | Fukushima | Soil        | Field, Soil under Miscanthus spp.                         | 26         | 5         | 31                   |
| 6              | Fukushima | Rhizosphere | River area (downstream), Litter mix                       | 18         | 4         | 22                   |
| 7              | Fukushima | Soil        | Paddy field, Soil under rice straw                        | 15         | 3         | 18                   |
| 8              | Fukushima | Soil        | Paddy field, Soil under rice straw and grasses            | 12         | 2         | 14                   |
| 9              | Fukushima | Rhizosphere | Litter mix, river area                                    | 14         | 3         | 17                   |
| 10             | Fukushima | Rhizosphere | Japanese pampas grass root                                | 10         | 2         | 12                   |
| 11             | Fukushima | Soil        | Soil under Japanese pampas grass, field                   | 24         | 5         | 29                   |
| 12             | Fukushima | Rhizosphere | Forest, Litter mix                                        | 3          | 0         | 3                    |
| 13             | Fukushima | Rhizosphere | Forest, Litter mix                                        | 16         | 4         | 20                   |
| 14             | Fukushima | Rhizosphere | Forest, Litter mix                                        | 3          | 0         | 3                    |
| 15             | Fukushima | Rhizosphere | Field, Miscanthus spp. Litter                             | 20         | 4         | 24                   |
| 16             | Fukushima | Rhizosphere | Paddy field, Rice straw                                   | 8          | 2         | 10                   |
| 17             | Fukushima | Rhizosphere | Field, Japanese pampas grass litter                       | 1          | 0         | 1                    |
| 18             | Fukushima | Rhizosphere | Field, Japanese pampas grass root                         | 18         | 4         | 22                   |
| 19             | Fukushima | Rhizosphere | Paddy field, Rice straw                                   | 17         | 4         | 21                   |
| 20             | Fukushima | Rhizosphere | Forest, Litter mix                                        | 23         | 5         | 28                   |
| <b>Total</b>   |           |             |                                                           | <b>320</b> | <b>66</b> | <b>386</b>           |

**Table S2.** Summary of SFM results under limited nutrients

| Group    | Sample name | Fe  | K | P<br>(inorganic) | N-free | Acid pH<br>(4.5 - 5.5) | Alkaline<br>pH (8 -10) | NaCl<br>(4%) |
|----------|-------------|-----|---|------------------|--------|------------------------|------------------------|--------------|
| Fungus   | Fuk 6       | -   | - | 1.0              | ++++   | ++++                   | ++++                   | ++++         |
|          | Fuk 9       | -   | - | +                | ++++   | ++++                   | ++++                   | ++++         |
|          | Fuk 10      | 2.0 | - | +                | ++++   | ++++                   | ++++                   | ++++         |
|          | Fuk 16      | -   | - | +                | ++++   | ++++                   | ++++                   | ++++         |
|          | Fuk 36      | -   | - | +                | -      | ++++                   | ++++                   | -            |
|          | Fuk 38      | -   | - | +                | ++++   | ++++                   | ++++                   | ++++         |
|          | Fuk 39      | -   | - | +                | ++++   | ++++                   | ++++                   | ++++         |
|          | Fuk 40      | -   | - | +                | -      | ++++                   | ++++                   | ++++         |
|          | Fuk 44      | -   | - | +                | ++++   | ++++                   | ++++                   | -            |
|          | Fuk 49      | -   | - | -                | ++++   | ++++                   | ++++                   | -            |
|          | Fuk 50      | -   | - | 1.1              | ++++   | ++++                   | ++++                   | ++++         |
|          | Fuk 58      | 2.0 | - | +                | ++++   | ++++                   | ++++                   | ++++         |
|          | Fuk 59      | -   | - | 1.3              | ++++   | ++++                   | ++++                   | ++++         |
|          | Fuk 63      | -   | - | +                | -      | ++++                   | ++++                   | ++++         |
|          | Fuk 66      | 2.0 | - | +                | ++++   | ++++                   | ++++                   | ++++         |
| Bacteria | Fuk 4_8     | -   | + | 1.0              | ++++   | ++++                   | ++++                   | ++++         |
|          | Fuk 4_10    | -   | + | +                | ++++   | ++++                   | ++++                   | ++++         |
|          | Fuk 4_31    | -   | + | 1.0              | ++++   | ++++                   | ++++                   | ++++         |
|          | Fuk 5_22    | -   | + | +                | ++++   | ++++                   | ++++                   | ++++         |
|          | Fuk 5_23    | -   | + | 1.1              | ++++   | ++++                   | ++++                   | ++++         |
|          | Fuk 7_4     | -   | + | 1.3              | ++++   | ++++                   | ++++                   | ++++         |
|          | Fuk 8_6     | -   | + | 1.3              | ++++   | ++++                   | ++++                   | ++++         |
|          | Fuk 10_6    | -   | + | 1.0              | ++++   | ++++                   | ++++                   | ++++         |
|          | Fuk 10_7    | -   | + | +                | ++++   | ++++                   | ++++                   | ++++         |
|          | Fuk 10_10   | -   | + | 1.0              | ++++   | ++++                   | ++++                   | ++++         |
|          | Fuk 11_1    | -   | + | +                | ++++   | ++++                   | ++++                   | ++++         |
|          | Fuk 11_2    | -   | + | 1.4              | ++++   | ++++                   | ++++                   | ++++         |
|          | Fuk 11_7    | -   | - | -                | -      | -                      | -                      | -            |
|          | Fuk 11_10   | -   | + | 1.2              | ++++   | -                      | ++++                   | ++++         |
|          | Fuk 11_14   | -   | + | +                | ++++   | ++++                   | ++++                   | ++++         |
|          | Fuk 13_14   | -   | + | 1.1              | ++++   | ++++                   | ++++                   | ++++         |
|          | Fuk 13_15   | -   | - | -                | ++++   | ++++                   | ++++                   | +            |
|          | Fuk 13_16   | -   | + | +                | ++++   | ++++                   | ++++                   | ++++         |

Average response with 3 replication of each test.

- No growth, + could growth, ++++ growth of the strains same or better than control
